# Supplementary material for: New information on the cranial and postcranial anatomy of the early synapsid &lt;i&gt;Ianthodon schultzei&lt;/i&gt; (Sphenacomorpha: Sphenacodontia), and its evolutionary significance
Source: Copernicus journal article supplement (doi:10.5194/fr-18-17-2015), 2014-10-06
Supplement: Supplementary file 1 [file fr-18-17-2015-supplement.zip]

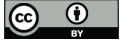

*Supplement of*

**New information on the cranial and postcranial anatomy of the early synapsid *Ianthodon schultzei* (Sphenacomorpha: Sphenacodontia), and its evolutionary significance**

**F. Spindler et al.**

*Correspondence to:* F. Spindler ([mail@frederik-spindler.de](mailto:mail@frederik-spindler.de)), D. Scott ([diane.scott@utoronto.ca](mailto:diane.scott@utoronto.ca)), and R. R. Reisz ([robert.reisz@utoronto.ca](mailto:robert.reisz@utoronto.ca))

- Supplement-Cover-Letter.pdf
- spindler\_MATRIX
